# Supplementary material for: Imagery Rescripting for Reducing Body Image Dissatisfaction: A Randomized Controlled Trial
Source: Springer Nature journal article supplement (doi:10.1007/s10608-022-10295-z), 2022-02-12
Supplement: MOESM1 [file 20128666]

**Questionnaire regarding imagery**

In this questionnaire, you will be asked to answer a few questions about imagery especially those related to your body and appearance.

What do we mean with imagery?

Imagery is when we see and experience different things and events with our “mind’s eye”. An image of the situation you are currently in could be that you, in your mind’s eye, see yourself in the room that you are currently in. Imagery does not have to be limited to visual experiences, also known as visualization; all five senses (sight, sound, smell, taste and touch) can be involved. You can also imagine things and events that lack an equivalent in reality. For example, we can imagine pink elephants.

Imagery differs from verbal thoughts, that is, when we think in words about things and events. A verbal thought about the situation you are currently in could be, “I hope I can answer this questionnaire quickly”.

**We would now like you to answer the questions below. It is important that your answers are honest and sincere. Therefore, we ask you to give the first answer that comes to you and not think about any of the questions for too long.**

1. How often do you experience imagery (include all imagery you have, both those about your body and appearance as well as others)? Mark with a cross on the line below at the point that best describes your answer.

I-----------------------------------------------------------------------------------I

Very rarely Very often

1. How often do you have imagery that is specifically related to your body or appearance? Mark with a cross on the line below at the point that best describes your answer.

I-----------------------------------------------------------------------------------I

Very rarely Very often

1. Briefly describe the imagery related to your body or appearance that you most often have and/or that has the strongest positive or negative emotional feeling. Indicate whether it is a positive or a negative feeling.

______________________________________________________________________________________________________________________________________________________________________________________________________________________________________________________________________________________________________________________________________________________________________________________________________________________________________________________________________________________________________________________________________________________________________________________________________

**Note that all the following questions will now be about the imagery that you briefly explained above**

1. Which sense or senses did you experience this imagery with? Circle the correct option or options.

Sight Sound

Touch Smell

Taste

1. Imagery can be experienced from different perspectives. Having an outside perspective is similar to how you perceive a scene in a movie. Having an inside perspective means that you experience the thing or situation within yourself. Mark with a cross on the line at the point that best fits the imagery that you described above (from a completely outside perspective to a completely inside perspective).

I-----------------------------------------------------------------------------------I

Completely outside Completely inside

1. At what time does this imagery take place? (From far in the past to present to far in the future).

I-----------------------------------------------------------------------------------I

Far in the past Present far in the future

1. How often do you experience this imagery? Circle the option that best suits you.

Daily

Every week

Every month

A few times a year

Rarely

Never

1. How long does the imagery usually last? Circle the option that is most commonly correct.

A few seconds

A few minutes

A few hours

Longer

1. Which feelings do you associate with the imagery? Circle the option or options that best suits you.

Happiness Connectedness

Relief Security

Sorry Anger

Fear Shame

Worry Guilt

Other feeling, specify which _____________________________________

1. How clear/sharp is the imagery? (From very vague to very clear). Mark with a cross on the line below.

I-----------------------------------------------------------------------------------I

Very vague Very clear

1. How negatively OR positively emotionally charged is the imagery?

I-----------------------------------------------------------------------------------I

Not at all ***negatively*** charged Very ***negatively*** charged

I-----------------------------------------------------------------------------------I

Not at all ***positively*** charged Very ***positively*** charged

1. How does the imagery affect you? Circle the option or options below (a-d) that best suit you and then give a brief description.
2. The imagery makes me act and do something. Describe as briefly as possible what it makes you do. ____________________________________________________________________________________________________________________________________________________________________________________
3. The imagery evokes thoughts. Describe the thoughts as briefly as possible. ____________________________________________________________________________________________________________________________________________________________________________________
4. The imagery fills me with emotions. Describe the emotions as briefly as possible. ____________________________________________________________________________________________________________________________________________________________________________________
5. The imagery affects me physically? Describe the physical reactions as briefly as possible

____________________________________________________________________________________________________________________________________________________________________________________

1. What message does the imagery convey?

Complete the sentence below with a maximum of five words.

It tells me that I am …

__________________________________________________________________________________________
